# Supplementary material
Source: publisher figshare collection journal article supplement (https://frontiersin.figshare.com/ndownloader/files/31025839)
Supplement: Supplementary file 1 [file 31025839]

**Table S1:** Proteomic results for systems involved in Zn homeostasis before and after addition of 2 mM ZnCl<sub>2</sub>, as indicated. Mean values of three independent experiments and standard deviations are indicated. Undetected proteins are highlighted in grey. Only one value of the triplicate was obtained for FolE.

| Pathway           | Protein | ID     | Average of AUC (Area Under the Curve) |     |          |          |     |          |          |     |          |
|-------------------|---------|--------|---------------------------------------|-----|----------|----------|-----|----------|----------|-----|----------|
|                   |         |        | t0                                    |     |          | 1h       |     |          | 5h       |     |          |
| Export            | CzcA    | PA2520 | 1.00E+05                              | +/- | 0.00E+00 | 3.62E+08 | +/- | 4.71E+07 | 1.47E+09 | +/- | 4.51E+07 |
|                   | CzcB    | PA2521 | 1.00E+05                              | +/- | 0.00E+00 | 7.33E+08 | +/- | 2.36E+07 | 2.79E+09 | +/- | 9.50E+07 |
|                   | CzcC    | PA2522 | 1.00E+05                              | +/- | 0.00E+00 | 3.94E+08 | +/- | 3.60E+07 | 1.64E+09 | +/- | 9.29E+07 |
|                   | CadA    | PA3690 | 1.93E+07                              | +/- | 4.11E+06 | 1.18E+09 | +/- | 2.89E+07 | 4.42E+08 | +/- | 2.78E+07 |
|                   | CzcD    | PA0397 | 1.00E+05                              | +/- | 0.00E+00 | 6.67E+04 | +/- | 5.77E+04 | 2.38E+08 | +/- | 8.02E+06 |
|                   | YjiP    | PA3963 |                                       |     |          |          |     |          |          |     |          |
| Uptake            | HmtA    | PA2435 | 1.45E+07                              | +/- | 6.86E+06 | 8.13E+06 | +/- | 0.00E+00 | 1.00E+05 | +/- | 0.00E+00 |
|                   | PA1922  | PA1922 | 2.27E+08                              | +/- | 5.29E+06 | 1.49E+08 | +/- | 7.21E+06 | 1.64E+07 | +/- | 2.00E+06 |
|                   | PA1923  | PA1923 | 1.73E+08                              | +/- | 3.92E+07 | 3.38E+07 | +/- | 7.53E+06 | 1.00E+05 | +/- | 0.00E+00 |
|                   | PA1924  | PA1924 | 1.60E+07                              | +/- | 3.25E+06 | 1.00E+05 | +/- | 0.00E+00 | 1.00E+05 | +/- | 0.00E+00 |
|                   | PA1925  | PA1925 | 5.61E+07                              | +/- | 1.31E+06 | 2.33E+07 | +/- | 3.21E+05 | 1.00E+05 | +/- | 0.00E+00 |
|                   | PA2911  | PA2911 | 3.57E+08                              | +/- | 7.64E+06 | 2.35E+08 | +/- | 5.20E+06 | 5.79E+07 | +/- | 6.18E+06 |
|                   | PA2912  | PA2912 | 1.15E+08                              | +/- | 3.21E+06 | 6.18E+07 | +/- | 1.39E+07 | 1.00E+05 | +/- | 0.00E+00 |
|                   | PA2913  | PA2913 | 2.06E+08                              | +/- | 2.89E+06 | 1.35E+08 | +/- | 3.51E+06 | 8.34E+06 | +/- | 0.00E+00 |
|                   | PA2914  | PA2914 |                                       |     |          |          |     |          |          |     |          |
|                   | PA4063  | PA4063 | 2.04E+09                              | +/- | 6.56E+07 | 1.78E+09 | +/- | 4.93E+07 | 3.19E+08 | +/- | 1.85E+07 |
|                   | PA4064  | PA4064 | 2.68E+08                              | +/- | 1.01E+07 | 1.69E+08 | +/- | 1.15E+07 | 2.26E+07 | +/- | 7.32E+06 |
|                   | PA4065  | PA4065 | 2.40E+08                              | +/- | 2.23E+07 | 1.66E+08 | +/- | 7.94E+06 | 3.00E+07 | +/- | 5.20E+06 |
|                   | PA4066  | PA4066 | 1.30E+08                              | +/- | 4.62E+06 | 9.66E+07 | +/- | 1.91E+06 | 1.00E+05 | +/- | 0.00E+00 |
|                   | ZnuA    | PA5498 | 2.68E+08                              | +/- | 2.01E+07 | 2.09E+08 | +/- | 8.19E+06 | 2.34E+07 | +/- | 1.12E+07 |
|                   | ZnuB    | PA5501 |                                       |     |          |          |     |          |          |     |          |
|                   | ZnuC    | PA5500 | 6.94E+07                              | +/- | 2.14E+07 | 7.68E+07 | +/- | 0.00E+00 | 1.00E+05 | +/- | 0.00E+00 |
|                   | ZnuD    | PA0781 | 7.07E+09                              | +/- | 3.67E+08 | 4.83E+09 | +/- | 2.86E+08 | 1.75E+09 | +/- | 1.39E+08 |
|                   | ZrmA    | PA4837 | 8.61E+08                              | +/- | 9.61E+06 | 5.35E+08 | +/- | 3.26E+07 | 1.06E+08 | +/- | 5.13E+06 |
|                   | ZrmB    | PA4836 | 1.54E+08                              | +/- | 5.03E+06 | 3.81E+07 | +/- | 5.83E+06 | 1.00E+05 | +/- | 0.00E+00 |
|                   | ZrmC    | PA4835 | 9.13E+07                              | +/- | 3.33E+06 | 6.00E+07 | +/- | 5.45E+06 | 1.00E+05 | +/- | 0.00E+00 |
|                   | ZrmD    | PA4834 | 2.42E+07                              | +/- | 0.00E+00 | 3.28E+07 | +/- | 0.00E+00 | 1.00E+05 | +/- | 0.00E+00 |
| C+/C-<br>paralogs | DksA    | PA4723 | 1.25E+09                              | +/- | 4.00E+07 | 9.26E+08 | +/- | 6.17E+07 | 1.12E+09 | +/- | 7.21E+07 |
|                   | DksA2   | PA5536 | 6.85E+08                              | +/- | 8.38E+07 | 3.36E+08 | +/- | 4.65E+07 | 1.52E+07 | +/- | 2.14E+06 |
|                   | RpmE    | PA5049 | 2.09E+09                              | +/- | 1.57E+08 | 2.26E+09 | +/- | 7.51E+07 | 2.25E+09 | +/- | 1.04E+08 |
|                   | RpmE2   | PA3601 | 2.48E+09                              | +/- | 4.58E+07 | 6.77E+08 | +/- | 7.13E+08 | 1.00E+00 | +/- | 0.00E+00 |
|                   | RpmJ    | PA4242 |                                       |     |          |          |     |          |          |     |          |
|                   | RpmJ2   | PA3600 |                                       |     |          |          |     |          |          |     |          |
|                   | PyrC    | PA3527 | 2.62E+08                              | +/- | 23180452 | 2.73E+08 | +/- | 8.62E+06 | 2.21E+08 | +/- | 3.37E+07 |
|                   | PyrC2   | PA5541 | 1.57E+08                              | +/- | 8.89E+06 | 1.30E+08 | +/- | 8.39E+06 | 2.21E+07 | +/- | 7.01E+06 |
| Others            | FolE    | PA3438 | 1.72E+08                              |     |          | 2.09E+08 |     |          | 2.04E+08 |     |          |
|                   | FolE2   | PA5539 | 6.03E+08                              | +/- | 1.27E+07 | 3.84E+08 | +/- | 7.09E+06 | 1.39E+07 | +/- | 1.79E+06 |
|                   | PA2807  | PA2807 | 1.00E+05                              | +/- | 0.00E+00 | 1.00E+05 | +/- | 0.00E+00 | 1.46E+08 | +/- | 2.76E+07 |
|                   | OprD    | PA0958 | 1.34E+09                              | +/- | 1.53E+07 | 9.50E+08 | +/- | 1.64E+07 | 2.23E+08 | +/- | 1.55E+07 |
|                   | PA5534  | PA5534 | 6.17E+08                              | +/- | 1.85E+07 | 3.85E+08 | +/- | 1.31E+07 | 1.00E+05 | +/- | 0.00E+00 |
|                   | PA5535  | PA5535 | 1.52E+09                              | +/- | 6.24E+07 | 6.83E+08 | +/- | 8.54E+07 | 4.78E+07 | +/- | 4.40E+06 |
|                   | PA5540  | PA5540 | 4.25E+08                              | +/- | 8.41E+07 | 2.75E+08 | +/- | 6.05E+07 | 1.60E+07 | +/- | 2.97E+06 |
