# Supplementary material
Source: publisher figshare collection journal article supplement (https://frontiersin.figshare.com/ndownloader/files/31025839)
Supplement: Supplementary file [file 31025839]

**Table S5:** Primers used in this study.

| Amplicon         | PA number | Primer        | Sequence 5'-3'          | Position<br>(from the AUG) | Length |
|------------------|-----------|---------------|-------------------------|----------------------------|--------|
| Coding regions   |           |               |                         |                            |        |
| <i>czcC</i>      | PA2522    | <i>czcC</i> 1 | GGTCAGCATCGGCAGCAAGTACG | 834                        | 206    |
|                  |           | <i>czcC</i> 2 | GGTCGTAGGCCTGTACCGCTTCG | 1039                       |        |
| <i>czcD</i>      | PA0397    | 574           | GGCGTGGCCTTCTATATCCT    | 285                        | 183    |
|                  |           | 575           | TCCAGACCTCCAGGTAGGC     | 450                        |        |
| <i>ptrA / c</i>  | PA2808    | 754           | CGTACCTTCACTGCCTCCAC    | 502                        | 176    |
|                  |           | 755           | TTGTCCTTCTTCGTCGCTTC    | 179                        |        |
|                  | PA2807    | 576           | GGTGCTCGGCGATATGTACT    | 212                        | 158    |
|                  |           | 577           | GCATCTCCAGCATCTCCTTC    | 350                        |        |
| <i>oprD</i>      | PA0958    | <i>oprD</i> 1 | ATCTACCGCACAAACGATGAAGG | 772                        | 156    |
|                  |           | <i>oprD</i> 2 | GCCGAAGCCGATATAATCAAACG | 927                        |        |
| <i>oprF</i>      | PA1777    | 594           | GGTACTTCTTGACCGACGA     | 172                        | 209    |
|                  |           | 595           | TCGCTGTTGATGTTGGTGAT    | 380                        |        |
| <i>a</i>         | PA2807    | 1338          | TTGACCTCGATCGCCCGAGG    | 238                        | 222    |
|                  |           | 1339          | ACAGGATAGGCGACATCAAC    | 35                         |        |
| <i>b</i>         | PA2807-08 | 1340          | AGGCGGCGCGGAAACATACG    | 70                         | 318    |
|                  |           | 1341          | ACCAGGAGAAACTGGCGAAG    | 134                        |        |
| Promoter regions |           |               |                         |                            |        |
| <i>pznuD</i>     | PA0781    | 1254          | ACTTTCCCGTTCCTCTTCGC    | -215                       | 197    |
|                  |           | 1255          | TGGGTCGGACTTTTTTCAGG    | -18                        |        |
| <i>pPA1922</i>   | PA1922    | 1256          | GAGCGCCATGATCTGCTCGG    | -197                       | 272    |
|                  |           | 1257          | GAAGCAGGTAGAGGAACGGC    | 75                         |        |
| <i>pPA2439</i>   | PA2439    | 1344          | GTGCTGCACACAGACTCTCG    | -140                       | 167    |
|                  |           | 1345          | GTCCAGGTCGACTCTCATCT    | 17                         |        |
| <i>pPA2911</i>   | PA2911    | 1258          | CATAGCAGGCCGCGTGAAG     | -458                       | 229    |
|                  |           | 1259          | TCACCGAAGTGACGCACCGG    | -229                       |        |
| <i>pPA4063</i>   | PA4063    | 1027          | GTTTCTCCACAAGCGAATCG    | -4                         | 182    |
|                  |           | 1028          | ATGGGCCTGGGCGGCGAACG    | -186                       |        |
| <i>pzrmA</i>     | PA4837    | 1109          | GGCTGGGCTGGTCGTCGGA     | -141                       | 225    |
|                  |           | 1110          | CCGCGGGACTTTCCGTTTCC    | 84                         |        |
| <i>pznuA</i>     | PA5498    | 969           | CTCTGCCAGACCAGTTCCAG    | -227                       | 214    |
|                  |           | 970           | TGAAAGGTGGTTAGCGGGTA    | -14                        |        |
| <i>prpmE2</i>    | PA3600    | 1107          | TCGAGCAGCCGAATGGTCGC    | -99                        | 182    |
|                  |           | 1108          | GGTGGAGCCGATCAGGAAGT    | 83                         |        |
| <i>pdksA2</i>    | PA5536    | 1105          | AGTAAAGGCGGAGGACGCGG    | -137                       | 203    |
|                  |           | 1106          | AGAAGTCCTGCTGGGCTTCG    | 66                         |        |
| DNA cloning      |           |               |                         |                            |        |
| Feature          |           | Primer        | Sequence 5'-3'          | Length                     |        |

|                              |      |                                                                       |      |  |
|------------------------------|------|-----------------------------------------------------------------------|------|--|
| <i>ΔPA2807</i>               | 588  | GCC <u>gaattc</u> CATGTTTCATCCCTCGTTA<br>CA                           | 489  |  |
|                              | 589b | GCC <u>ggtacc</u> ACATCTTTGTCAGCTTGC<br>CG                            |      |  |
|                              | 590b | GCC <u>ggtacc</u> CGATCCGTATACACTTG<br>CCG                            | 425  |  |
|                              | 591  | GCC <u>ggtacc</u> GGTCTTTCTGCAATACC<br>GCG                            |      |  |
| <i>ΔcopRS</i>                | 715  | CCC <u>gaattc</u> CTGTCGGGAGCATTACAT<br>CT                            | 491  |  |
|                              | 716  | CCC <u>ggtacc</u> TCGTTACATTTGCCGGCC<br>AT                            |      |  |
|                              | 717  | CCC <u>ggtacc</u> AACGCGAAGCCCCCATG<br>ACG                            | 393  |  |
|                              | 718  | CCC <u>ggtacc</u> GTGCTGGTGGTGGTGCT<br>TAC                            |      |  |
| <i>pMMB66EH-PA2807</i>       | 626  | GCC <u>gaattc</u> ATGCTCCCGACAGCCAG<br>CCG                            | 639  |  |
|                              | 627  | GCC <u>ggtacc</u> TTCACGCCGGCCGTCCG<br>CCG                            |      |  |
| <i>pME6001- PA2807::6His</i> | 1309 | CGC <u>ggtacc</u> TCAGCAGTTTCATGTTC<br>ATC                            | 1115 |  |
|                              | 1310 | CGC <u>aagctt</u> TCA <b>atgatgatgatgatg</b> GGG<br>CTGCACGGTCAGTTGAC |      |  |
| <i>pGEX2T-zur</i>            | 1044 | GCG <u>ggtacc</u> ATGTACAAGATTGCGCC<br>CAAGACCC                       | 503  |  |
|                              | 1045 | GCC <u>gaattc</u> TCAGGCGTCCTTCTGGTC<br>CC                            |      |  |

Restriction sites are underlined (lowercase) and 6His tag is indicated as lowercase in bold
